# Supplementary material for: A plausible role for actin gamma smooth muscle 2 (ACTG2) in small intestinal neuroendocrine tumorigenesis
Source: BMC Endocr Disord. 2016 Apr 23;16:19. doi: 10.1186/s12902-016-0100-3 (PMC4841950; doi:10.1186/s12902-016-0100-3)
Supplement: Additional file 1: Table S1. — Patient characteristics, immunohistochemistry analysis of ACTG2 and miR-145 analysis in SI-NETs (XLSX 49 kb) [file 12902_2016_100_MOESM1_ESM.xlsx]

## Sheet: Sheet1
Supplementary Table 1 Patient characteristics, immunohistochemistry analysis of ACTG2 and miR-145 analysis in SI-NETs
Patient	Sex	Tumor	WHO Grade	TNM Stage	Age at diagnosis	Alive (A) /Dead (D)	Follow-up (years)	IHC	miR-145*
1	M	LNM	2	4	58	D	3		1
2	F	PT	1	4	70	D	8	+i	1.47
3	M	PT	1	3b	77	D	9	-
		LNM							0.84
4	F	PT	2	4	68	A	10		0.85
		LM							0.13
5	F	PT	1	4	74	A	9	-	1.59
6	F	PT	2	3b	63	D	8	-
		LNM							1.06
7	F	PT	1	4	55	A	8	+i
		LNM							1.3
8	M	LM	1	4	68	A	8		0.15
9	F	PT	1	4	63	A	8	-
10	F	PT	1	4	53	A	7		0.52
		LM							0.09
11	F	LM	1	4	46	A	6		0.19
		LNM							0.34
12	F	LM	1	4	45	N.d.	N.d.		0.65
13	F	PT	2	3b	59	A	5		2.07
		LNM							1
14	F	PT	2	4	66	D	2		0.34
		LNM							0.41
15	F	LM	2	4	51	A	5		0.11
16	F	PT	2	4	76	D	3	+i	1.77
		LNM							1.22
17	M	LNM	2	4	66	A	4		0.76
18	M	PT	1	4	61	N.d.	N.d.		3.1
		LM							0.22
19	F	PT	1	4	58	A	2	-
		LNM						-
20	F	PT	2	3	73	A	2	-
		LNM						-
21	M	PT	2	4	66	A	2	+i
22	F	PT	1	4	60	A	1	(+)
		LNM						+i
23	F	PT	2	4	65	A	1	(+)
24	F	PT	2	4	52	D	8	-
		LNM						-
25	M	LNM	2	4	76	A	0	-
26	M	PT	1	3	70	A	0	++
		LNM						++
27	M	PT	1	4	71	A	0	+i
		LNM						-
28	F	PT	1	3b	47	A	25	-
		LNM						-
M, male. F, female. IHC, immunohistochemistry. PT, primary tumor. LNM, lymph node metastasis. LM, liver metastasis. N.d., not determined. -, negative. (+), weak staining in all tumor cells. +i, positive staining in tumor cell islets. ++, positive staining in large areas of tumor cells. *, relative value.
